# Supplementary material
Source: PubMed Central journal article supplement (PMC5739284)
Supplement: NIHMS74403-supplement-Supplementary_information_.pdf [file NIHMS74403-supplement-Supplementary_information_.pdf]

**Supplementary Information:**

***Plasmodium* UIS3 sequesters host LC3 to avoid elimination by autophagy in hepatocytes**

Eliana Real, Lénia Rodrigues, Ghislain G. Cabal, Francisco J. Enguita, Liliana Mancio-Silva, João Mello-Vieira, Wandy Beatty, Iset M. Vera, Vanessa Zuzarte-Luís, Tiago N. Figueira, Gunnar R. Mair, Maria M. Mota

The Supplementary Information includes:

**Supplementary Figure 1.** Rescue of *uis3(-)* infectivity.

**Supplementary Figure 2.** Schematic representation of the *uis3* complementation locus.

**Supplementary Figure 3.** Specificity of the UIS3-LC3 interaction.

**Supplementary Figure 4.** Non-canonical LC3 targeting to the PVM.

**Supplementary Figure 5.** Modelling of the protein-protein interaction between UIS3 and LC3.

**Supplementary Figure 6.** Model depicting the mechanism of UIS3 protection against host autophagy.

**Supplementary Figures 7 - 11.** Raw data.

**Supplementary Table 1.** Plasmids used in this study.

**Supplementary Table 2.** Primers used for *P. berghei* genotyping.

**Supplementary Table 3.** Primers used for qRT-PCR

**Supplementary Table 4.** Primers used for UIS3 mutagenesis.

**Supplementary Table 5.** Statistical analysis.

**Supplementary References**

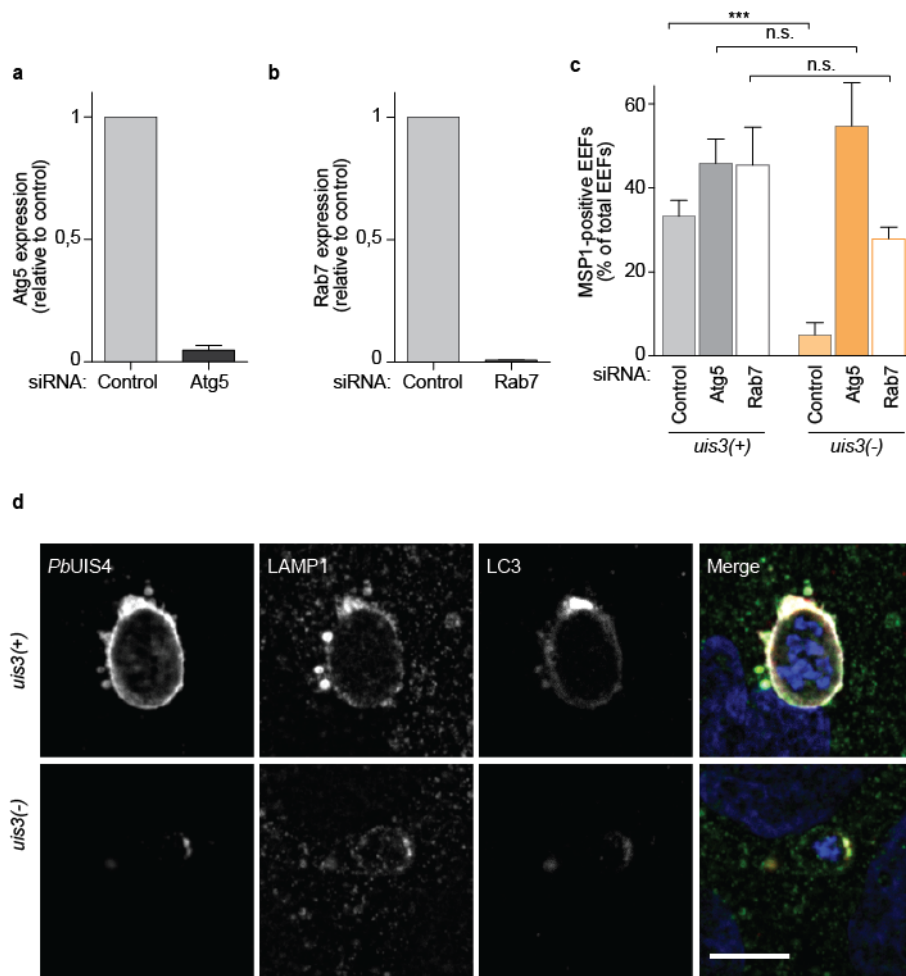

**Supplementary Figure 1. Rescue of *uis3(-)* infectivity.** **a, b** Expression of Atg5 (a) and Rab7 (b) in HepG2 cells 48 h after siRNA transfection. The mean + SEM of three independent experiments is shown. **c**, Percentage of MSP1-positive parasites quantified by fluorescence microscopy 65 h after infection of HepG2 cells. The bars represent the mean + SEM of pooled replicates from two (Atg5, Rab7) to four (Control) independent experiments. Statistical significance was assessed using non-parametric two-tailed Mann-Whitney test: n.s.  $P > 0.05$ ; \*\*\* $P < 0.001$ . **d**, Huh7 cells infected with *uis3(+)* or *uis3(-)* parasites (top and bottom panels, respectively) were fixed 24 h after infection and immunostained with anti-UIS4 (white), anti-LAMP1 (green), anti-LC3 (red), and Hoescht (blue). LAMP1 remains outside the lumen of wild-type parasites, but can be observed in the cytosol of dying *uis3(-)* mutants, implying that fusion between the PVM and lysosomes has occurred. The data is representative of at least three independent experiments.

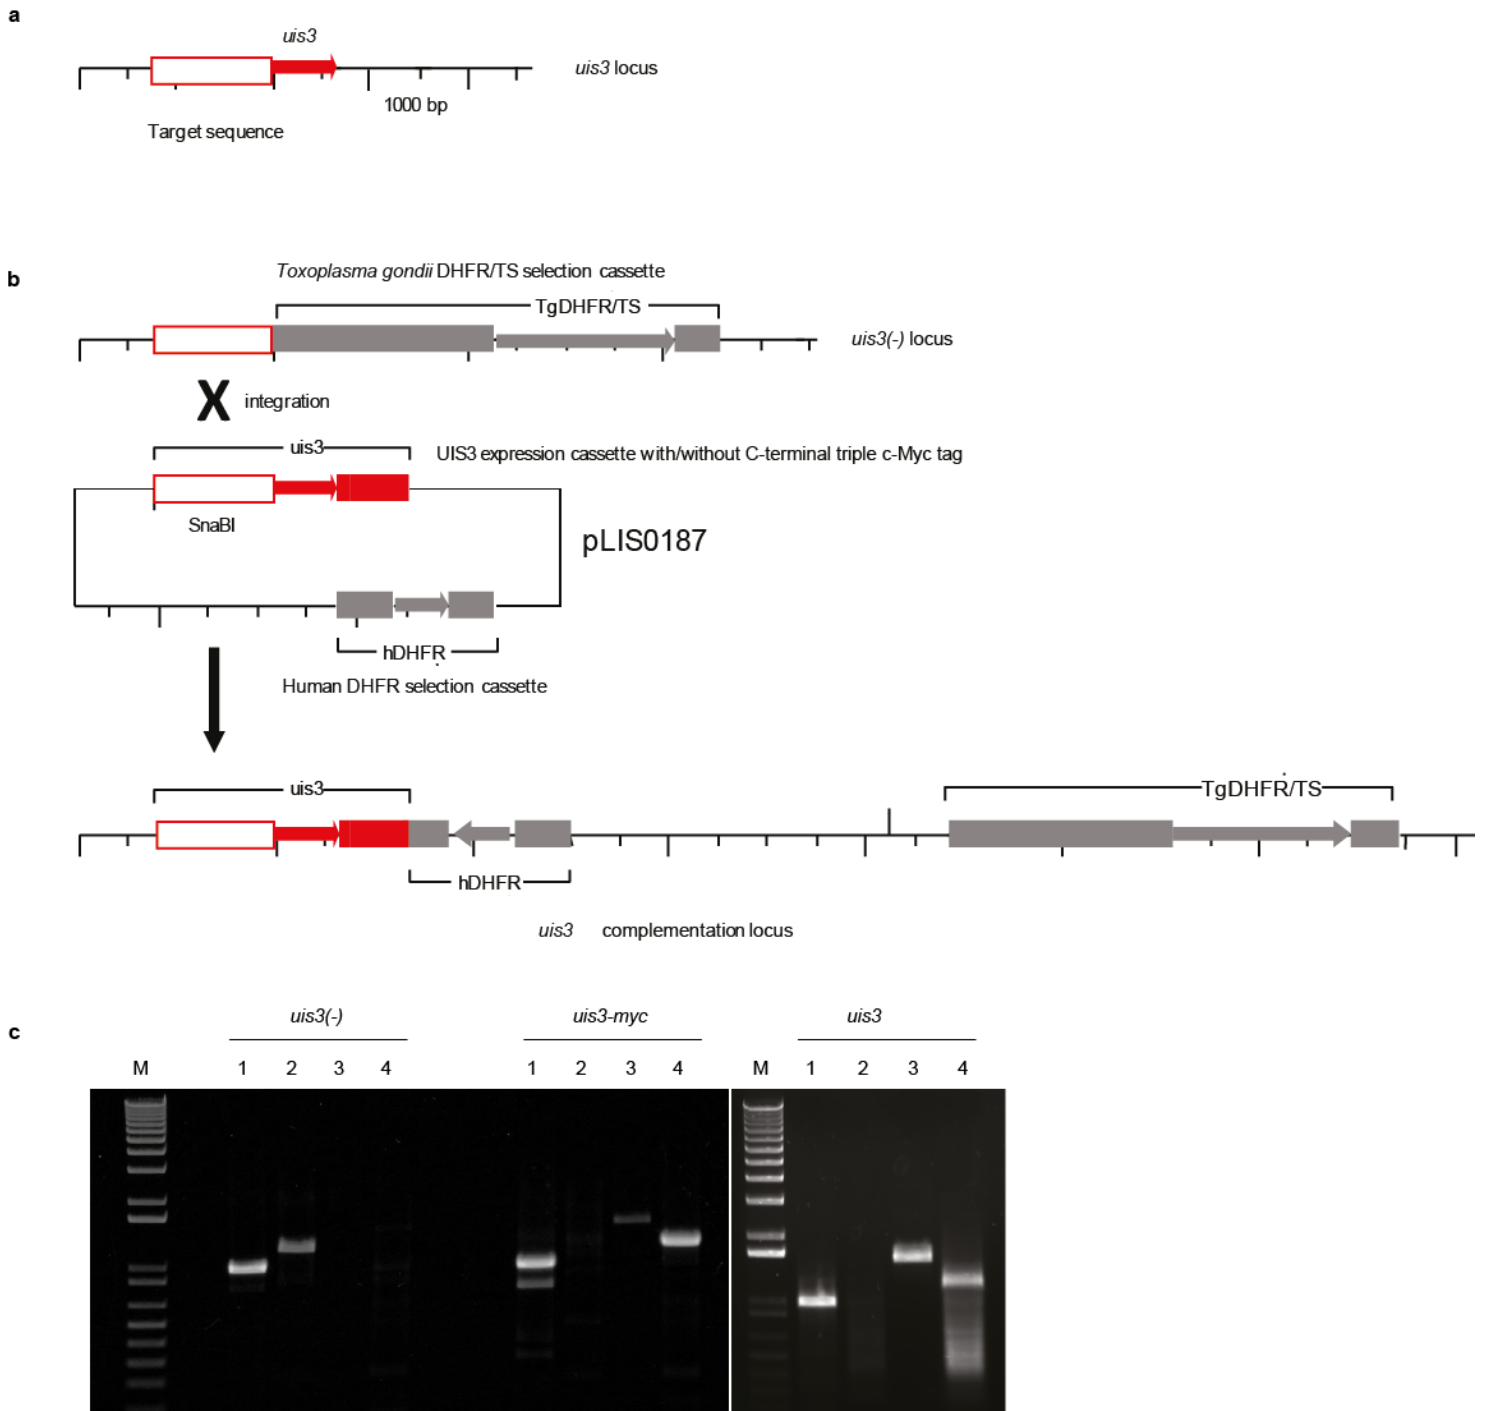

**Supplementary Figure 2. Schematic representation of the *uis3* complementation locus.** **a**, *P. berghei* *uis3* wild-type locus (PBANKA\_1400800). **b**, Complementation of the *uis3(-)* locus with *uis3* through single cross-over recombination. The *uis3* complementation locus comprises the *uis3* gene with or without a C-terminal triple c-Myc tag and the human DHFR cassette for drug selection. **c**, PCRs confirming the integration of the *uis3* (with or without *myc*) complementation cassette after transfection of *uis3(-)* parasites and drug selection. The primers used are listed in Table S2. 1: RNA polymerase II (control); 2: *uis3(-)* locus; 3: *uis3* complementation locus 5' integration; 4: *uis3* complementation locus 3' integration.

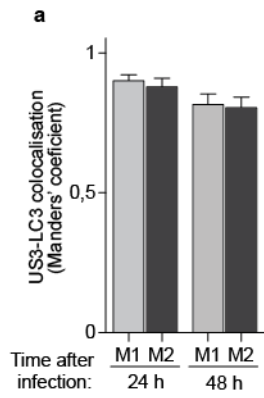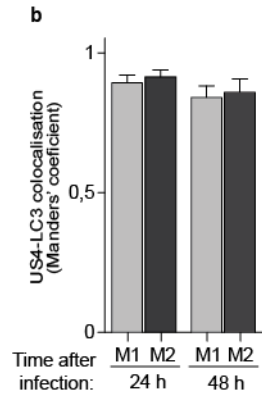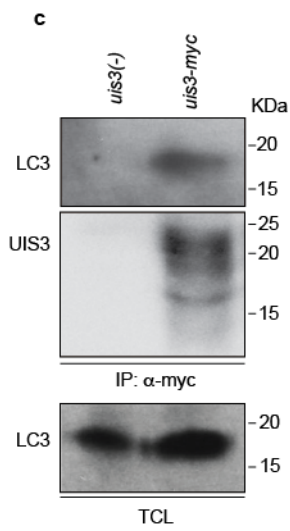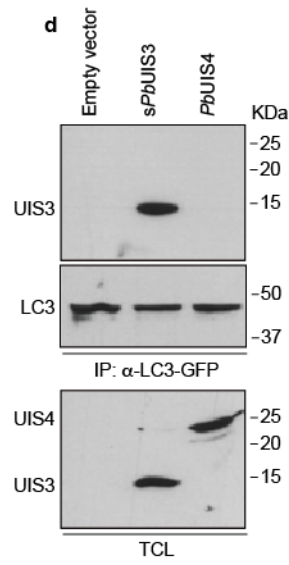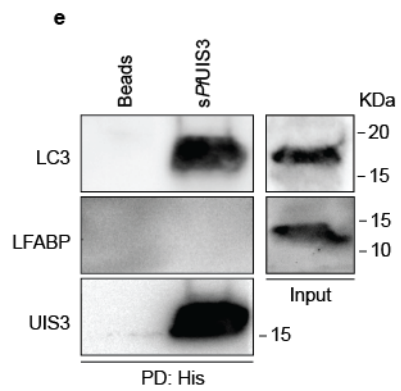

**Supplementary Figure 3. Specificity of the UIS3-LC3 interaction.** **a, b**, Manders' coefficients M1 and M2 (mean + SEM) for colocalisation of UIS3 (a) and UIS4 (b) with LC3. The high Manders' coefficients (values range from 0 to 1) indicate that both parasite proteins colocalise with LC3 to the PVM. Ten randomly selected cells were analysed at each time point. **c**, Lysates of mouse primary hepatocytes infected with *uis3-myc* or *uis3(-)* *P. berghei* were immunoprecipitated with anti-myc. Analysis of the precipitates was done by western-blot with anti-LC3 and anti-myc antibodies (top and middle panels). Total cell lysates (TCL) were immunoblotted with anti-LC3 (bottom panel). **d**, Whole cell lysates of GFP-LC3 HeLa cells expressing HA-tagged *sPbUIS3* or *PbUIS4* (extracellular domain) were immunoprecipitated with GFP-Trap beads and analysed by western-blot with anti-HA and anti-LC3 (top and middle panels). UIS3, but not UIS4, co-immunoprecipitated with GFP-LC3. The bottom panel shows the levels of UIS3 and UIS4 in TCL. **e**, Recombinant His-tagged *sPfUIS3* was used to pulldown HepG2 total cell extracts. The input and pulldown fractions were probed with antibodies against LC3 (top panels) and L-FABP (middle panels). The pulldown was additionally probed with anti-myc to detect UIS3 (bottom panel). LC3, but not L-FABP, could be detected in the *sPfUIS3* pulldown fraction. One immunoblot representative of two independent experiments is shown (c-e).

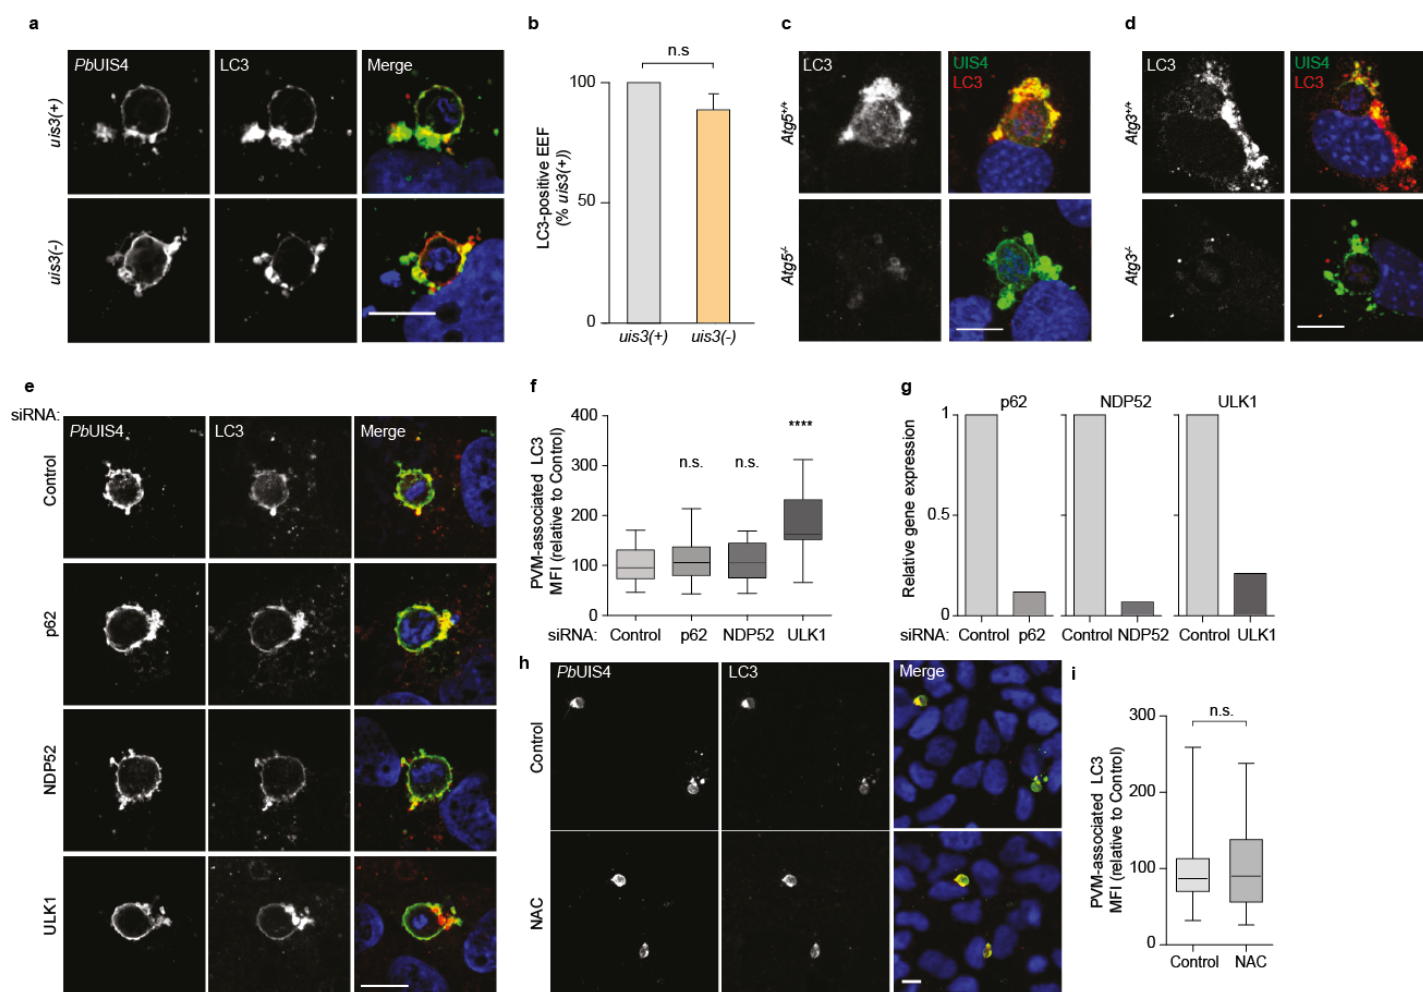

**Supplementary Figure 4. Non-canonical LC3 targeting to the PVM.** **a**, Huh7 cells infected with *uis3(+)* (top panel) or *uis3(-)* (bottom panel) parasites were fixed 24 h after infection and immunostained with anti-UIS4 (red), anti-LC3 (green), and Hoechst (blue). Representative images (six independent experiments) are shown. **b**, Number of *uis3(+)* and *uis3(-)* EEFs showing LC3 association 24 h after infection. The bars represent the mean + SEM of > 50 EEFs from six independent experiments, normalised to the average of the *uis3(+)* control. **c**, **d**, Wild-type (top panels) and autophagy-deficient (bottom panels) MEFs were fixed 24 h after infection with *P. berghei* and immunostained as in (a). Representative images (three independent experiments) of infected Atg5 (c) and Atg3 (d) MEFs are shown. **e**, HepG2 cells treated with the indicated siRNAs and infected with wild-type *P. berghei* parasites were fixed 24 h after infection and immunostained as in (a). **f**, Analysis of PVM-associated LC3. The bars represent the box-plot distribution of the mean fluorescence intensity (MFI) measured in the PVM of 17 to 23 EEFs (two independent experiments) and normalized to the control. The whiskers represent maximum and minimum values. **g**, Expression of silenced genes in HepG2 cells 48 h after siRNA transfection. One representative experiment is shown. **h**, Huh7 cells treated with the ROS scavenger N-acetylcysteine (NAC) from 2 h before to 24 h after infection with *P. berghei* parasites were fixed and immunostained as in (a). **i**, MFI of PVM-associated LC3 (box-plot distribution; the whiskers represent maximum and minimum values) in control and NAC-treated Huh7 cells normalized to the average of the control (> 70 EEFs; two independent experiments). Scale bar, 10  $\mu$ m. Statistical significance was assessed using non-parametric two-tailed Mann-Whitney test: n.s.  $P > 0.05$ ; \*\*\*\* $P < 0.0001$ .

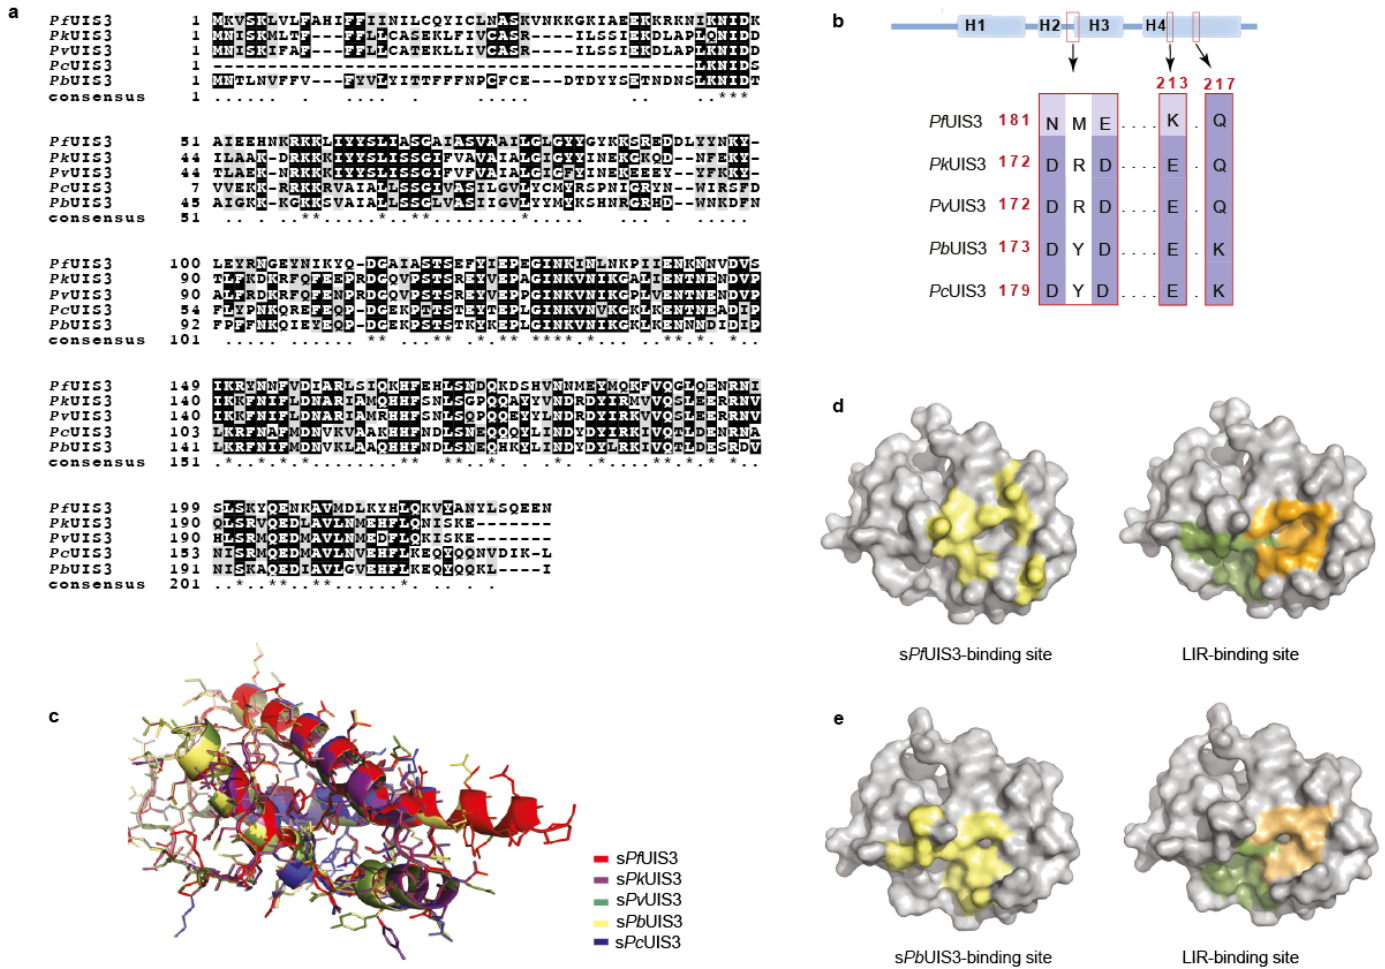

**Supplementary Figure 5. Modelling of the protein-protein interaction between UIS3 and LC3.** **a**, ClustalW alignment of the UIS3 sequences from 5 *Plasmodium* species infecting humans, non-human primates, and rodents. Identical (\*) and conserved (.) amino acids are shaded in black and grey, respectively. **b**, Secondary structure of the UIS3 soluble domain. The location of the amino acids putatively involved in LC3 binding is shown in red boxes. A sequence alignment (scored and colour-coded according to the BLOSUM62 substitution matrix) underscores the conservation of the amino acids involved in the interaction with LC3, with only one predicted residue (non-coloured) diverging significantly between *Plasmodium* species. **c**, Structure of the soluble domain of *P. falciparum* UIS3 (PDB code: 2VWA) superimposed with homology models of the corresponding UIS3 domains from *P. berghei*, *P. chabaudi*, *P. knowlesi*, and *P. vivax*. **d, e**, Structure of LC3 (PDB code: 2ZJD) with putative UIS3-binding amino acids highlighted in yellow (left) and the two hydrophobic pockets involved in the interaction with canonical LIR motifs coloured green and orange (right). The putative UIS3-binding sites for *P. falciparum* and *P. berghei* UIS3 are depicted in (d) and (e), respectively. Both show partial overlap with the LIR-binding surface.

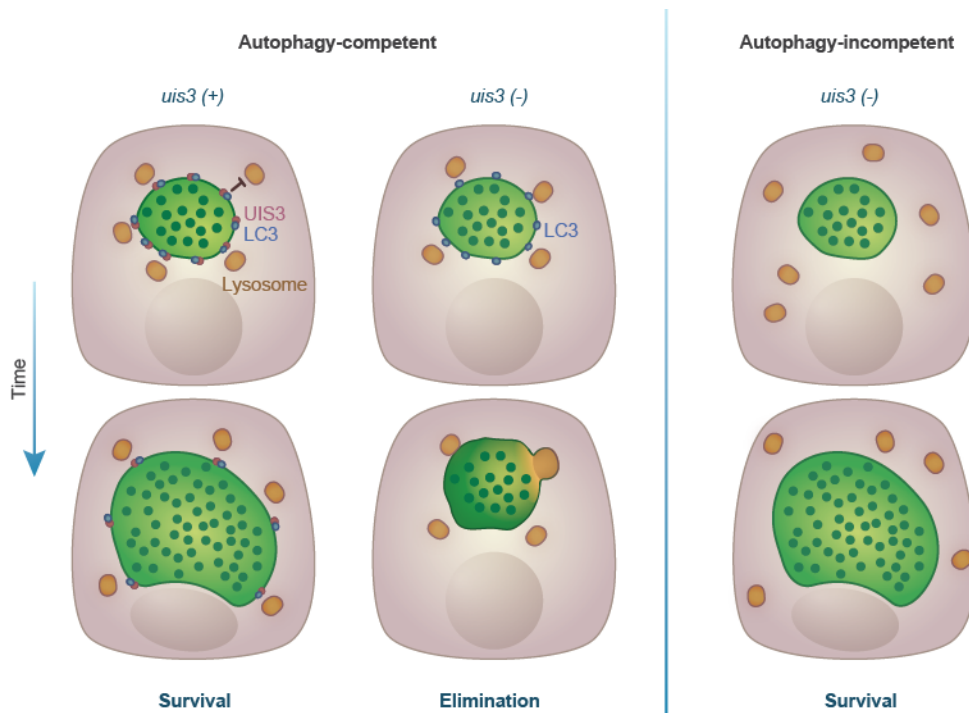

**Supplementary Figure 6. Model depicting the mechanism of UIS3 protection against host autophagy.** UIS3 interacts with LC3 on the PVM of liver stage *Plasmodium*, blocking the autophagic flux. In this way, wild-type, but not *uis3(-)* parasites avoid LC3-dependent fusion with host lysosomes (inhibition depicted as  $\perp$ ). *uis3(-)* parasites become fully viable and infectious when the autophagy pathway of the host cell is compromised.



**Supplementary Figures 7-11. Raw data**

Figure 1f

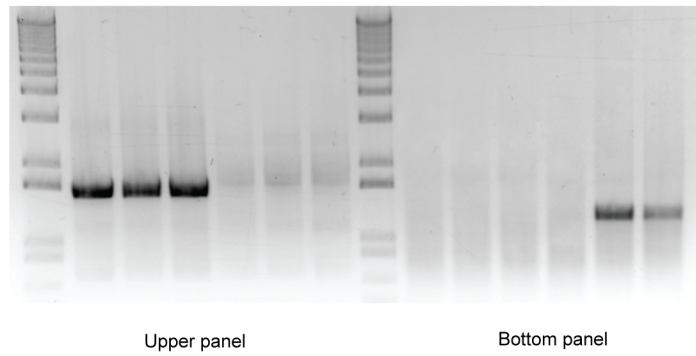

**Supplementary Figure 7.** Raw data of Figure 1f. Image acquired using a ChemiDoc imaging system. M, 1 Kb DNA ladder.

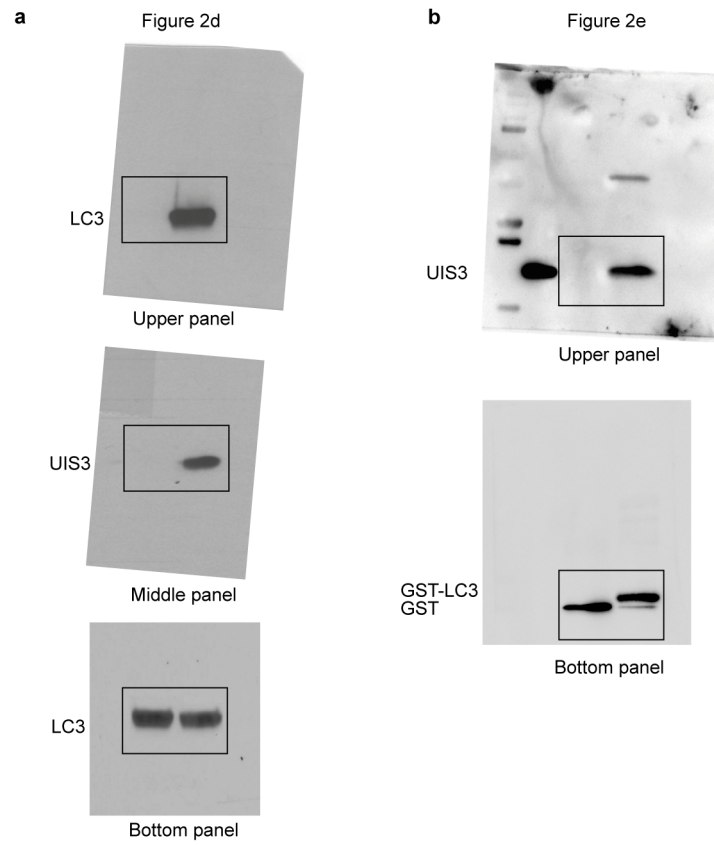

**Supplementary Figure 8.** **a**, Raw data of Figure 2d. **b**, Raw data of Figure 2e. The boxes show where the images were cropped to produce the main figure.

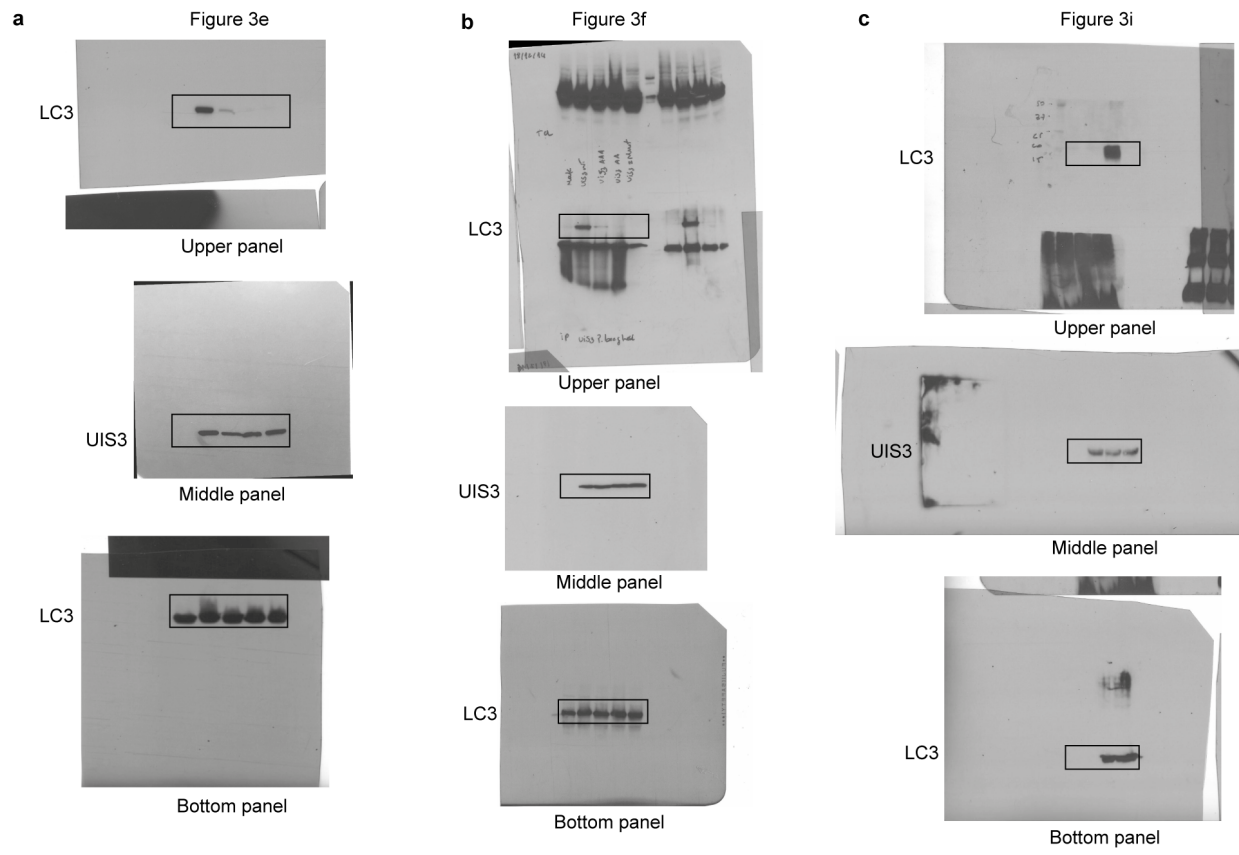

**Supplementary Figure 9.** **a**, Raw data of Figure 3e. **b**, Raw data of Figure 3f. **c**, Raw data of Figure 3i. The boxes show where the images were cropped to produce the main figure.

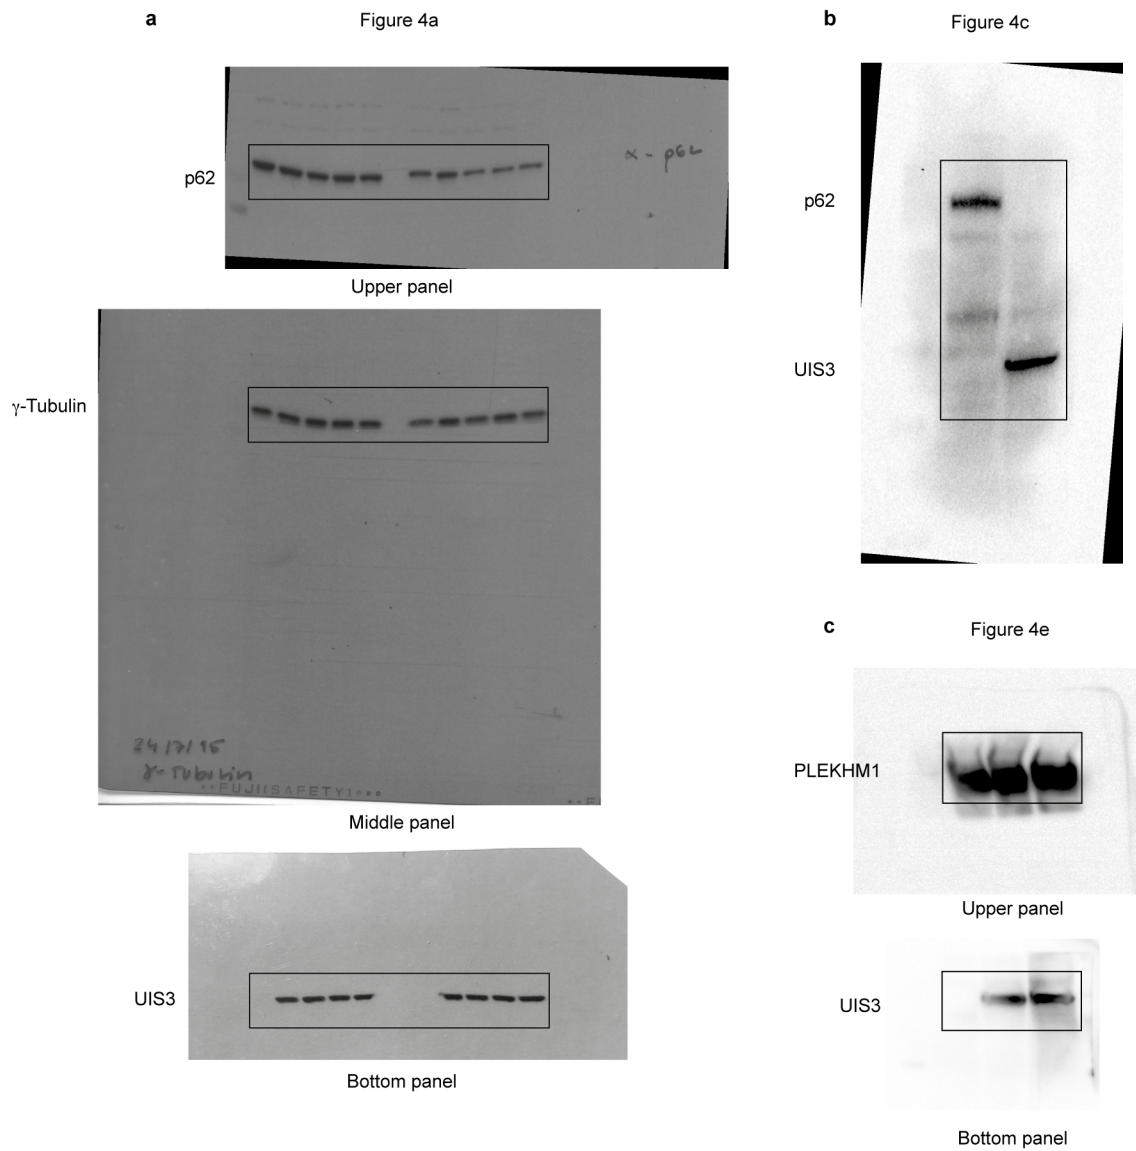

**Supplementary Figure 10.** **a**, Raw data of Figure 4a. **b**, Raw data of Figure 4c. **c**, Raw data of Figure 4e. (**b**, **c**) Images acquired using a ChemiDoc imaging system. The boxes show where the images were cropped to produce the main figure.

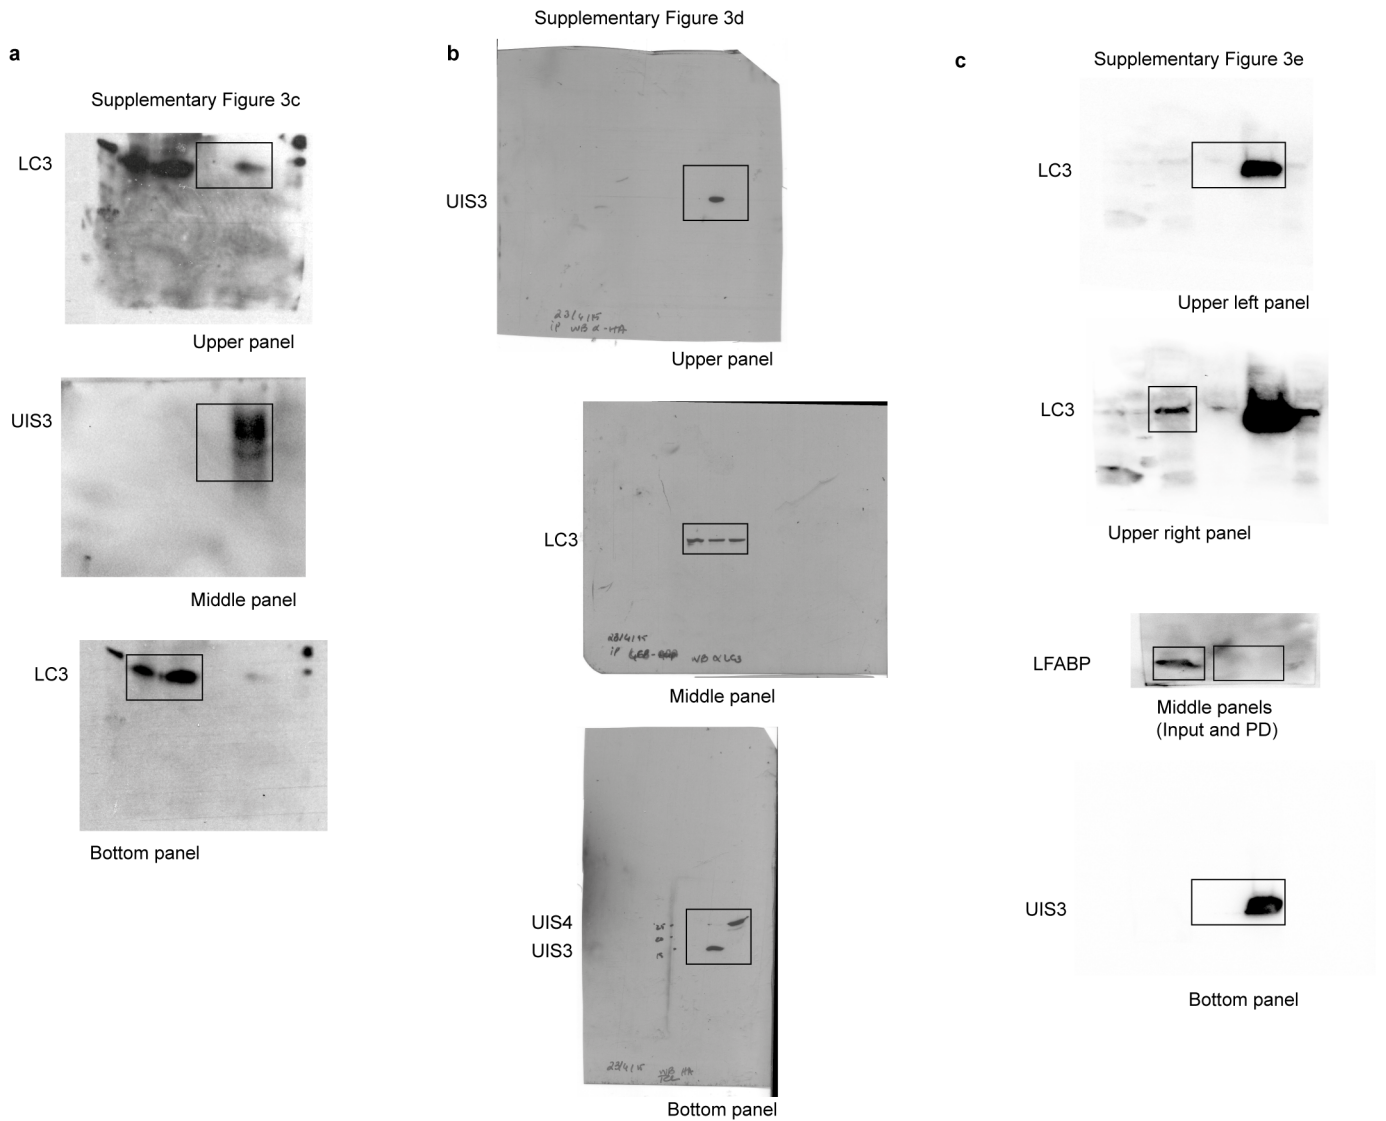

**Supplementary Figure 11.** **a**, Raw data of Supplementary Figure 3c. **b**, Raw data of Supplementary Figure 3d. Note that the top and bottom images shown in (a) correspond to the same gel, revealed using different exposure times. In our opinion, the input and pulldown bands are not directly comparable, since the amount of total protein varies between the two samples. Therefore, even though on this occasion both samples appear on the same gel, the exposure conditions were optimized for each sample separately. Similarly, the top two images in (c) also correspond to the same gel, and the exposure conditions were also optimized for each sample (input and pulldown) separately. **c**, Raw data of Supplementary Figure 3e. (a, c) Images acquired using a ChemiDoc imaging system. The boxes show where the images were cropped to produce the main figure.

## Supplementary Tables

**Supplementary Table 1.** Plasmids used in this study

| Plasmid/Tag                                                                       | Gene/Mutations                                                            | Reference                    |
|-----------------------------------------------------------------------------------|---------------------------------------------------------------------------|------------------------------|
| pCMV-MYC- <i>sPbUIS3</i> <sup>WT</sup>                                            | <i>P. berghei</i> soluble UIS3                                            | This study                   |
| pCMV-MYC- <i>sPbUIS3</i> <sup>Mut1</sup>                                          | <i>P. berghei</i> soluble UIS3<br>D173A, Y174A, D175A                     | This study                   |
| pCMV-MYC- <i>sPbUIS3</i> <sup>Mut2</sup>                                          | <i>P. berghei</i> soluble UIS3<br>E205A, K209A                            | This study                   |
| pCMV-MYC- <i>sPbUIS3</i> <sup>Mut3</sup>                                          | <i>P. berghei</i> soluble UIS3<br>D173A, Y174A, D175A, E205A,<br>K209A    | This study                   |
| pCMV-MYC- <i>sPfUIS3</i> <sup>WT</sup>                                            | <i>P. falciparum</i> soluble UIS3                                         | This study                   |
| pCMV-MYC- <i>sPfUIS3</i> <sup>Mut1</sup>                                          | <i>P. falciparum</i> soluble UIS3<br>N181A, M182A, E183A                  | This study                   |
| pCMV-MYC- <i>sPfUIS3</i> <sup>Mut2</sup>                                          | <i>P. falciparum</i> soluble UIS3<br>K213A, Q217A                         | This study                   |
| pCMV-MYC- <i>sPfUIS3</i> <sup>Mut3</sup>                                          | <i>P. falciparum</i> soluble UIS3<br>N181A, M182A, E183A, K213A,<br>Q217A | This study                   |
| pCMV-HA- <i>sPbUIS3</i>                                                           | <i>P. berghei</i> soluble UIS3                                            | This study                   |
| pCMV-HA- <i>PbUIS4</i>                                                            | <i>P. berghei</i> UIS4 aa 100-220                                         | This study                   |
| pCMV-HA-LC3 <sup>WT</sup>                                                         | Human LC3B                                                                | This study                   |
| pCMV-HA-LC3 <sup>Mut</sup>                                                        | Human LC3B<br>R11A, K49A, T50A, K51A,<br>F52A, L53A                       | This study                   |
| pETM30-LC3B (GST-His6 fusion)                                                     | Human LC3B                                                                | Supplementary<br>Reference 1 |
| pET28a-UIS3 (His6 fusion)                                                         | <i>P. falciparum</i> soluble UIS3                                         | This study                   |
| pET49b                                                                            | GST-His6                                                                  | Novagen                      |
| pEGFP-PLEKHM1                                                                     | Human PLEKHM1                                                             | Reference 46                 |
| MP5-Luc-p62 ( <i>Renilla</i> luciferase<br>fusion)                                | Human p62                                                                 | Supplementary<br>Reference 1 |
| pCMV-MYC-Luc- <i>sPfUIS3</i> <sup>WT</sup><br>( <i>Renilla</i> luciferase fusion) | <i>P. falciparum</i> soluble UIS3                                         | This study                   |

|                                                                             |                                                          |            |
|-----------------------------------------------------------------------------|----------------------------------------------------------|------------|
| pCMV-MYC-Luc-sPfUIS3 <sup>Mut1</sup><br>( <i>Renilla</i> luciferase fusion) | <i>P. falciparum</i> soluble UIS3<br>N181A, M182A, E183A | This study |
| pCMV-MYC-Luc-sPfUIS3 <sup>Mut4</sup><br>( <i>Renilla</i> luciferase fusion) | <i>P. falciparum</i> soluble UIS3<br>N181A               | This study |
| pCMV-MYC-Luc-sPfUIS3 <sup>Mut5</sup><br>( <i>Renilla</i> luciferase fusion) | <i>P. falciparum</i> soluble UIS3<br>M182A               | This study |
| pCMV-MYC-Luc-sPfUIS3 <sup>Mut6</sup><br>( <i>Renilla</i> luciferase fusion) | <i>P. falciparum</i> soluble UIS3<br>E183A               | This study |
| pCMV-MYC-Luc-sPfUIS3 <sup>Mut7</sup><br>( <i>Renilla</i> luciferase fusion) | <i>P. falciparum</i> soluble UIS3<br>K213A               | This study |
| pCMV-MYC-Luc-sPfUIS3 <sup>Mut8</sup><br>( <i>Renilla</i> luciferase fusion) | <i>P. falciparum</i> soluble UIS3<br>Q217A               | This study |

**Supplementary Table 2.** Primers used for *P. berghei* genotyping

| <b>PCR reaction</b>            | <b>Primers pairs</b>                                                   |
|--------------------------------|------------------------------------------------------------------------|
| 5' integration                 | 5'TAATTGATCAACATAATG3';<br>5'GTTCTTTATATTTTGTACTAGTGCTTGGC3'           |
| 3' integration                 | 5' GTTTTCCCAGTCACGACGTTG 3';<br>5'ATTGTTGACCTGCAGGCATG3'               |
| <i>uis3(-)</i> locus           | 5'TAATTGATCAACATAATG3';<br>5'ATTGTTGACCTGCAGGCATG3'                    |
| RNA polymerase II<br>(control) | 5'AAAGAATTCTGATGGTTTACAATCACC3';<br>5'AAAGCGGCCGCTTTCTTCCTGCATCTCCTC3' |



**Supplementary Table 3.** Primers used for qRT-PCR

| <b>PCR reaction</b> | <b>Primers pairs</b>                                         |
|---------------------|--------------------------------------------------------------|
| Atg5                | 5'AGACCTTCTGCACTGTCCAT3';<br>5'CGATTGATGGCCCAAACTGG3'        |
| Rab7                | 5' GATGTCTTCCCGACTCCAGA3';<br>5'TCCGTTTAGTCTCCTCCTCG3'       |
| SQSTM1/p62          | 5'TTCTTTTCCCTCCGTGCTC3';<br>5'GGATCCGAGTGTGAATTTCC3'         |
| NDP52               | 5'GCAAGACAGCTGATGTGGG3';<br>5'CACTCTGCCCTGTTGCTGT3'          |
| ULK1                | 5'CGTTGCAGTACTCCATAACCAG3';<br>5'GGGGAAGGAAATCAAAATCC3'      |
| HPRT1               | 5'TTTGCTGACCTGCTGGATTAC3';<br>5'CAAGACATTCTTTCCAGTTAAAGTTG3' |

**Supplementary Table 4.** Primers used for UIS3 mutagenesis

| <b>PCR reaction</b>            | <b>Primers pairs</b>                                                                              |
|--------------------------------|---------------------------------------------------------------------------------------------------|
| <i>sPfUIS3</i> <sup>Mut4</sup> | 5' TTTCTGCATGTACTCCATGGCGTTCACGTGGCTGTCTTTC 3';<br>5' GAAAGACAGCCACGTGAACGCCATGGAGTACATGCAGAAA 3' |
| <i>sPfUIS3</i> <sup>Mut5</sup> | 5' GAATTTCTGCATGTACTCCGCGTTGTTACACGTGGCTGTCT 3';<br>5'AGACAGCCACGTGAACAACGCGGAGTACATGCAGAAATTC 3' |
| <i>sPfUIS3</i> <sup>Mut6</sup> | 5'CGAATTTCTGCATGTACGCCATGTTGTTACACGTGG 3';<br>5' CCACGTGAACAACATGGCGTACATGCAGAAATTCG 3'           |
| <i>sPfUIS3</i> <sup>Mut7</sup> | 5'CTTCTGCAGATGGTACGCCAGGTCCATCACGGCC 3';<br>5' GGCCGTGATGGACCTGGCGTACCATCTGCAGAAG 3'              |
| <i>sPfUIS3</i> <sup>Mut8</sup> | 5'TAGTTGGCGTACACCTTCGCCAGATGGTACTTCAGGTC 3';<br>5'GACCTGAAGTACCATCTGGCGAAGGTGTACGCCAACTA 3'       |

**Supplementary Table 5.** Statistical analysis

| Fig. 1c (n=2-4)               | P value  | Test                                      |
|-------------------------------|----------|-------------------------------------------|
| Control siRNA <i>uis3</i> (+) | < 0,0001 | Non-parametric two-tailed<br>Mann-Whitney |
| Control siRNA <i>uis3</i> (-) |          |                                           |
| Atg5 siRNA <i>uis3</i> (+)    | 0,0714   |                                           |
| Atg5 siRNA <i>uis3</i> (-)    |          |                                           |
| Rab7 siRNA <i>uis3</i> (+)    | 0,0547   |                                           |
| Rab7 siRNA <i>uis3</i> (-)    |          |                                           |

| Fig. 1g (n=5)                            | P value  | Test                                      |
|------------------------------------------|----------|-------------------------------------------|
| MEFS Atg3 <sup>+/+</sup> <i>uis3</i> (+) | 0,0002   | Non-parametric two-tailed<br>Mann-Whitney |
| MEFS Atg3 <sup>+/+</sup> <i>uis3</i> (-) |          |                                           |
| MEFS Atg3 <sup>-/-</sup> <i>uis3</i> (+) | 0,4277   |                                           |
| MEFS Atg3 <sup>-/-</sup> <i>uis3</i> (-) |          |                                           |
| MEFS Atg5 <sup>+/+</sup> <i>uis3</i> (+) | 0,0016   |                                           |
| MEFS Atg5 <sup>+/+</sup> <i>uis3</i> (-) |          |                                           |
| MEFS Atg5 <sup>-/-</sup> <i>uis3</i> (+) | 0,9399   |                                           |
| MEFS Atg5 <sup>-/-</sup> <i>uis3</i> (-) |          |                                           |
| MEFS Atg7 <sup>+/+</sup> <i>uis3</i> (+) | < 0,0001 | Non-parametric two-tailed<br>Mann-Whitney |
| MEFS Atg7 <sup>+/+</sup> <i>uis3</i> (-) |          |                                           |
| MEFS Atg7 <sup>-/-</sup> <i>uis3</i> (+) | 0,6604   |                                           |
| MEFS Atg7 <sup>-/-</sup> <i>uis3</i> (-) |          |                                           |

| Fig. 1h (n=3)           | P value | Test                                      |
|-------------------------|---------|-------------------------------------------|
| Control <i>uis3</i> (+) | <0,0001 | Non-parametric two-tailed<br>Mann-Whitney |
| Control <i>uis3</i> (-) |         |                                           |
| Control <i>uis3</i> (+) | 0,3020  |                                           |
| CQ <i>uis3</i> (+)      |         |                                           |
| Control <i>uis3</i> (+) | 0,3421  |                                           |
| CQ <i>uis3</i> (-)      |         |                                           |
| Control <i>uis3</i> (-) | 0,0003  |                                           |
| CQ <i>uis3</i> (-)      |         |                                           |

| Fig. 3g (n=2)                  | P value | Test                              |
|--------------------------------|---------|-----------------------------------|
| <i>sPfUIS3</i> <sup>WT</sup>   | <0.0001 | Unpaired two-tailed <i>t</i> Test |
| <i>sPfUIS3</i> <sup>Mut1</sup> |         |                                   |
| <i>sPfUIS3</i> <sup>WT</sup>   | 0,0081  |                                   |
| <i>sPfUIS3</i> <sup>Mut4</sup> |         |                                   |
| <i>sPfUIS3</i> <sup>WT</sup>   | 0,0028  |                                   |
| <i>sPfUIS3</i> <sup>Mut5</sup> |         |                                   |
| <i>sPfUIS3</i> <sup>WT</sup>   | 0,0088  |                                   |
| <i>sPfUIS3</i> <sup>Mut6</sup> |         |                                   |
| <i>sPfUIS3</i> <sup>WT</sup>   | 0,0012  |                                   |
| <i>sPfUIS3</i> <sup>Mut7</sup> |         |                                   |
| <i>sPfUIS3</i> <sup>WT</sup>   | 0,0264  |                                   |
| <i>sPfUIS3</i> <sup>Mut8</sup> |         |                                   |

| Fig. 4b (n=5)                      | P value  | Test                              |
|------------------------------------|----------|-----------------------------------|
| Empty vector control               | < 0,0001 | Unpaired two-tailed <i>t</i> test |
| Empty vector aa starvation         |          |                                   |
| UIS3 <sup>WT</sup> control         | 0,2334   |                                   |
| UIS3 <sup>WT</sup> aa starvation   |          |                                   |
| UIS3 <sup>Mut1</sup> control       | 0,0001   |                                   |
| UIS3 <sup>Mut1</sup> aa starvation |          |                                   |
| UIS3 <sup>Mut2</sup> control       | < 0,0001 |                                   |
| UIS3 <sup>Mut2</sup> aa starvation |          |                                   |
| UIS3 <sup>Mut3</sup> control       | < 0,0001 |                                   |
| UIS3 <sup>Mut3</sup> aa starvation |          |                                   |

| Fig. 4d (n=2-3) | P value  | Test          |
|-----------------|----------|---------------|
| p62             | < 0,0001 | Two-way ANOVA |
| <i>sPfUIS3</i>  |          |               |

| Fig. 4e GFP Fluorescence (n=3)               | P value  | Test                              |
|----------------------------------------------|----------|-----------------------------------|
| GFP-PLEKHM1                                  | < 0,0001 | Unpaired two-tailed <i>t</i> test |
| GFP-PLEKHM1 + <i>sPfUIS3</i> <sup>WT</sup>   |          |                                   |
| GFP-PLEKHM1                                  | 0,0828   |                                   |
| GFP-PLEKHM1 + <i>sPfUIS3</i> <sup>Mut1</sup> |          |                                   |
| GFP-PLEKHM1 + <i>sPfUIS3</i> <sup>WT</sup>   | 0,0107   |                                   |
| GFP-PLEKHM1 + <i>sPfUIS3</i> <sup>Mut1</sup> |          |                                   |

| Fig. 4e <i>sPfUIS3</i> Luciferase activity (n=3) | P value  | Test                              |
|--------------------------------------------------|----------|-----------------------------------|
| GFP-PLEKHM1 + <i>sPfUIS3</i> <sup>WT</sup>       | < 0,0001 | Unpaired two-tailed <i>t</i> test |
| GFP-PLEKHM1 + <i>sPfUIS3</i> <sup>Mut1</sup>     |          |                                   |

| Extended data Fig. 1c (n=2-4) | P value | Test                                      |
|-------------------------------|---------|-------------------------------------------|
| Control siRNA <i>uis3</i> (+) | 0,0006  | Non-parametric two-tailed<br>Mann-Whitney |
| Control siRNA <i>uis3</i> (-) |         |                                           |
| Atg5 siRNA <i>uis3</i> (+)    | 0,4534  |                                           |
| Atg5 siRNA <i>uis3</i> (-)    |         |                                           |
| Rab7 siRNA <i>uis3</i> (+)    | 0,1199  |                                           |
| Rab7 siRNA <i>uis3</i> (-)    |         |                                           |

| Extended Data Fig. 4b (n=6) | P value | Test                                      |
|-----------------------------|---------|-------------------------------------------|
| <i>uis3</i> (+)             | 0,0740  | Non-parametric two-tailed<br>Mann-Whitney |
| <i>uis3</i> (-)             |         |                                           |

| Extended Data Fig. 4f (n=17-23) | P value  | Test                                      |
|---------------------------------|----------|-------------------------------------------|
| Control siRNA                   | 0,3931   | Non-parametric two-tailed<br>Mann-Whitney |
| p62 siRNA                       |          |                                           |
| Control siRNA                   | 0,7397   |                                           |
| NDP52 siRNA                     |          |                                           |
| Control siRNA                   | < 0,0001 |                                           |
| ULK1 siRNA                      |          |                                           |

| Extended Data Fig. 4i (n=71-75) | P value | Test                                      |
|---------------------------------|---------|-------------------------------------------|
| Control                         | 0,9220  | Non-parametric two-tailed<br>Mann-Whitney |
| NAC                             |         |                                           |

## Supplementary References

1. von Muhlinen, N. *et al.* LC3C, bound selectively by a noncanonical LIR motif in NDP52, is required for antibacterial autophagy. *Mol. Cell* **48**, 329–42 (2012).
